# Supplementary material for: Identification of Temporal Characteristic Networks of Peripheral Blood Changes in Alzheimer’s Disease Based on Weighted Gene Co-expression Network Analysis
Source: Front Aging Neurosci. 2019 May 21;11:83. doi: 10.3389/fnagi.2019.00083 (PMC6537635; doi:10.3389/fnagi.2019.00083)
Supplement: Supplementary file 5 [file Data_Sheet_1.ZIP]

Archive with 367 entries (362 files):
- Supplementary Materials S1/
- Supplementary Materials S1/ROC/
- Supplementary Materials S1/ROC/ROC GSE63060 BLACK AD-CTL DG .pdf
- Supplementary Materials S1/ROC/ROC GSE63060 BLACK AD-CTL DG BG .pdf
- Supplementary Materials S1/ROC/ROC GSE63060 BLACK AD-CTL LH  .pdf
- Supplementary Materials S1/ROC/ROC GSE63060 BLACK AD-CTL LH BG .pdf
- Supplementary Materials S1/ROC/ROC GSE63060 BLACK AD-MCI DG .pdf
- Supplementary Materials S1/ROC/ROC GSE63060 BLACK AD-MCI DG BG.pdf
- Supplementary Materials S1/ROC/ROC GSE63060 BLACK AD-MCI LH .pdf
- Supplementary Materials S1/ROC/ROC GSE63060 BLACK AD-MCI LH BG .pdf
- Supplementary Materials S1/ROC/ROC GSE63060 BLACK MCI-CTL DG BG.pdf
- Supplementary Materials S1/ROC/ROC GSE63060 BLACK MCI-CTL DG.pdf
- Supplementary Materials S1/ROC/ROC GSE63060 BLACK MCI-CTL LH .pdf
- Supplementary Materials S1/ROC/ROC GSE63060 BLACK MCI-CTL LH BG.pdf
- Supplementary Materials S1/ROC/ROC GSE63060 BLUE AD-CTL   DG BG.pdf
- Supplementary Materials S1/ROC/ROC GSE63060 BLUE AD-CTL   DG.pdf
- Supplementary Materials S1/ROC/ROC GSE63060 BLUE AD-CTL   LH BG.pdf
- Supplementary Materials S1/ROC/ROC GSE63060 BLUE AD-CTL   LH.pdf
- Supplementary Materials S1/ROC/ROC GSE63060 BLUE AD-MCI   LH BG.pdf
- Supplementary Materials S1/ROC/ROC GSE63060 BLUE AD-MCI  DG .pdf
- Supplementary Materials S1/ROC/ROC GSE63060 BLUE AD-MCI  DG BG.pdf
- Supplementary Materials S1/ROC/ROC GSE63060 BLUE AD-MCI  LH.pdf
- Supplementary Materials S1/ROC/ROC GSE63060 BLUE MCI-CTL  DG BG.pdf
- Supplementary Materials S1/ROC/ROC GSE63060 BLUE MCI-CTL  DG.pdf
- Supplementary Materials S1/ROC/ROC GSE63060 BLUE MCI-CTL  LH .pdf
- Supplementary Materials S1/ROC/ROC GSE63060 BLUE MCI-CTL  LH BG.pdf
- Supplementary Materials S1/ROC/ROC GSE63060 BROWN AD-CTL DG BG.pdf
- Supplementary Materials S1/ROC/ROC GSE63060 BROWN AD-CTL DG.pdf
- Supplementary Materials S1/ROC/ROC GSE63060 BROWN AD-CTL LH BG.pdf
- Supplementary Materials S1/ROC/ROC GSE63060 BROWN AD-CTLLH.pdf
- Supplementary Materials S1/ROC/ROC GSE63060 BROWN AD-MCI DG BG.pdf
- Supplementary Materials S1/ROC/ROC GSE63060 BROWN AD-MCI DG.pdf
- Supplementary Materials S1/ROC/ROC GSE63060 BROWN AD-MCI LH BG.pdf
- Supplementary Materials S1/ROC/ROC GSE63060 BROWN AD-MCI LH.pdf
- Supplementary Materials S1/ROC/ROC GSE63060 BROWN MCI-CTL   LH BG.pdf
- Supplementary Materials S1/ROC/ROC GSE63060 BROWN MCI-CTL   LH.pdf
- Supplementary Materials S1/ROC/ROC GSE63060 BROWN MCI-CTL DG BG.pdf
- Supplementary Materials S1/ROC/ROC GSE63060 BROWN MCI-CTLDG.pdf
- Supplementary Materials S1/ROC/ROC GSE63060 PINK AD-CTL DG BG.pdf
- Supplementary Materials S1/ROC/ROC GSE63060 PINK AD-CTL DG.pdf
- Supplementary Materials S1/ROC/ROC GSE63060 PINK AD-CTL LH BG.pdf
- Supplementary Materials S1/ROC/ROC GSE63060 PINK AD-CTL LH.pdf
- Supplementary Materials S1/ROC/ROC GSE63060 PINK AD-MCI DG .pdf
- Supplementary Materials S1/ROC/ROC GSE63060 PINK AD-MCI DG BG.pdf
- Supplementary Materials S1/ROC/ROC GSE63060 PINK AD-MCI LH BG.pdf
- Supplementary Materials S1/ROC/ROC GSE63060 PINK AD-MCI LH.pdf
- Supplementary Materials S1/ROC/ROC GSE63060 PINK MCI-CTL DG BG.pdf
- Supplementary Materials S1/ROC/ROC GSE63060 PINK MCI-CTL DG.pdf
- Supplementary Materials S1/ROC/ROC GSE63060 PINK MCI-CTL LH .pdf
- Supplementary Materials S1/ROC/ROC GSE63060 PINK MCI-CTL LH BG .pdf
- Supplementary Materials S1/ROC/ROC GSE63060 RED AD-CTL DG BG.pdf
- Supplementary Materials S1/ROC/ROC GSE63060 RED AD-CTL DG.pdf
- Supplementary Materials S1/ROC/ROC GSE63060 RED AD-CTL LH .pdf
- Supplementary Materials S1/ROC/ROC GSE63060 RED AD-CTL LH BG.pdf
- Supplementary Materials S1/ROC/ROC GSE63060 RED AD-MCI DG BG.pdf
- Supplementary Materials S1/ROC/ROC GSE63060 RED AD-MCI DG.pdf
- Supplementary Materials S1/ROC/ROC GSE63060 RED AD-MCI LH BG.pdf
- Supplementary Materials S1/ROC/ROC GSE63060 RED AD-MCI LH.pdf
- Supplementary Materials S1/ROC/ROC GSE63060 RED MCI-CTL DDG.pdf
- Supplementary Materials S1/ROC/ROC GSE63060 RED MCI-CTL DG.pdf
- Supplementary Materials S1/ROC/ROC GSE63060 RED MCI-CTL LH BG.pdf
- Supplementary Materials S1/ROC/ROC GSE63060 RED MCI-CTL LH.pdf
- Supplementary Materials S1/ROC/ROC GSE63060 TURQUIOSE AD-CTL LH BG.pdf
- Supplementary Materials S1/ROC/ROC GSE63060 TURQUIOSE AD-CTL LH.pdf
- Supplementary Materials S1/ROC/ROC GSE63060 TURQUIOSE AD-CTLDG.pdf
- Supplementary Materials S1/ROC/ROC GSE63060 TURQUIOSE AD-MCI DG BG.pdf
- Supplementary Materials S1/ROC/ROC GSE63060 TURQUIOSE AD-MCI DG.pdf
- Supplementary Materials S1/ROC/ROC GSE63060 TURQUIOSE AD-MCI LH BG.pdf
- Supplementary Materials S1/ROC/ROC GSE63060 TURQUIOSE AD-MCI LH.pdf
- Supplementary Materials S1/ROC/ROC GSE63060 TURQUIOSE MCI-CTL DG BG.pdf
- Supplementary Materials S1/ROC/ROC GSE63060 TURQUIOSE MCI-CTL DG.pdf
- Supplementary Materials S1/ROC/ROC GSE63060 TURQUIOSE MCI-CTL LH BG.pdf
- Supplementary Materials S1/ROC/ROC GSE63060 YELLOW  AD-CTL DG BG.pdf
- Supplementary Materials S1/ROC/ROC GSE63060 YELLOW  AD-CTL DG.pdf
- Supplementary Materials S1/ROC/ROC GSE63060 YELLOW  AD-CTL LH BG.pdf
- Supplementary Materials S1/ROC/ROC GSE63060 YELLOW  AD-CTL LH.pdf
- Supplementary Materials S1/ROC/ROC GSE63060 YELLOW  AD-MCI DG BG.pdf
- Supplementary Materials S1/ROC/ROC GSE63060 YELLOW  AD-MCI DG.pdf
- Supplementary Materials S1/ROC/ROC GSE63060 YELLOW  AD-MCI LH BG.pdf
- Supplementary Materials S1/ROC/ROC GSE63060 YELLOW  AD-MCI LH.pdf
- Supplementary Materials S1/ROC/ROC GSE63060 YELLOW  MCI-CTL DG BG.pdf
- Supplementary Materials S1/ROC/ROC GSE63060 YELLOW  MCI-CTL DG.pdf
- Supplementary Materials S1/ROC/ROC GSE63060 YELLOW  MCI-CTL LH BG.pdf
- Supplementary Materials S1/ROC/ROC GSE63060 YELLOW  MCI-CTL LH.pdf
- Supplementary Materials S1/ROC/ROC GSE63060TURQUIOSE MCI-CTL LH.pdf
- Supplementary Materials S1/ROC/ROC GSE63061 BLACK AD-CTL  DG BG.pdf
- Supplementary Materials S1/ROC/ROC GSE63061 BLACK AD-CTL  DG.pdf
- Supplementary Materials S1/ROC/ROC GSE63061 BLACK AD-CTL  LH BG.pdf
- Supplementary Materials S1/ROC/ROC GSE63061 BLACK AD-CTL  LH.pdf
- Supplementary Materials S1/ROC/ROC GSE63061 BLACK AD-MCI  DG .pdf
- Supplementary Materials S1/ROC/ROC GSE63061 BLACK AD-MCI  DG BG .pdf
- Supplementary Materials S1/ROC/ROC GSE63061 BLACK AD-MCI  LH BG.pdf
- Supplementary Materials S1/ROC/ROC GSE63061 BLACK AD-MCI  LH.pdf
- Supplementary Materials S1/ROC/ROC GSE63061 BLACK MCI-CTL  DG BG.pdf
- Supplementary Materials S1/ROC/ROC GSE63061 BLACK MCI-CTL  DG pdf.pdf
- Supplementary Materials S1/ROC/ROC GSE63061 BLACK MCI-CTL  LH .pdf
- Supplementary Materials S1/ROC/ROC GSE63061 BLACK MCI-CTL  LH BGpdf.pdf
- Supplementary Materials S1/ROC/ROC GSE63061 BLUE AD-CTL   DG BG.pdf
- Supplementary Materials S1/ROC/ROC GSE63061 BLUE AD-CTL   DG.pdf
- Supplementary Materials S1/ROC/ROC GSE63061 BLUE AD-CTL   LH BG.pdf
- Supplementary Materials S1/ROC/ROC GSE63061 BLUE AD-CTL   LH.pdf
- Supplementary Materials S1/ROC/ROC GSE63061 BLUE AD-MCI   DG.pdf
- Supplementary Materials S1/ROC/ROC GSE63061 BLUE AD-MCI   DGpdf.pdf
- Supplementary Materials S1/ROC/ROC GSE63061 BLUE AD-MCI   LH BGpdf.pdf
- Supplementary Materials S1/ROC/ROC GSE63061 BLUE AD-MCI   LH pdf.pdf
- Supplementary Materials S1/ROC/ROC GSE63061 BLUE MCI-CTL   DG BGpdf.pdf
- Supplementary Materials S1/ROC/ROC GSE63061 BLUE MCI-CTL   DGpdf.pdf
- Supplementary Materials S1/ROC/ROC GSE63061 BLUE MCI-CTL   LH .pdf
- Supplementary Materials S1/ROC/ROC GSE63061 BLUE MCI-CTL   LH BGpdf.pdf
- Supplementary Materials S1/ROC/ROC GSE63061 BROWN AD-CTL DG BG.pdf
- Supplementary Materials S1/ROC/ROC GSE63061 BROWN AD-CTL DG.pdf
- Supplementary Materials S1/ROC/ROC GSE63061 BROWN AD-CTL LH BG.pdf
- Supplementary Materials S1/ROC/ROC GSE63061 BROWN AD-CTL LH.pdf
- Supplementary Materials S1/ROC/ROC GSE63061 BROWN AD-MCI DG BG.pdf
- Supplementary Materials S1/ROC/ROC GSE63061 BROWN AD-MCI DG.pdf
- Supplementary Materials S1/ROC/ROC GSE63061 BROWN AD-MCI LH BG.pdf
- Supplementary Materials S1/ROC/ROC GSE63061 BROWN AD-MCI LH.pdf
- Supplementary Materials S1/ROC/ROC GSE63061 BROWN MCI-CTL DG BG.pdf
- Supplementary Materials S1/ROC/ROC GSE63061 BROWN MCI-CTL LH BG.pdf
- Supplementary Materials S1/ROC/ROC GSE63061 BROWN MCI-CTL LH.pdf
- Supplementary Materials S1/ROC/ROC GSE63061 BROWN MCI-CTLDG.pdf
- Supplementary Materials S1/ROC/ROC GSE63061 PINK AD-CTL DG BG.pdf
- Supplementary Materials S1/ROC/ROC GSE63061 PINK AD-CTL DG.pdf
- Supplementary Materials S1/ROC/ROC GSE63061 PINK AD-CTL LH BG.pdf
- Supplementary Materials S1/ROC/ROC GSE63061 PINK AD-CTL LH.pdf
- Supplementary Materials S1/ROC/ROC GSE63061 PINK AD-MCI DG BG.pdf
- Supplementary Materials S1/ROC/ROC GSE63061 PINK AD-MCI DG.pdf
- Supplementary Materials S1/ROC/ROC GSE63061 PINK AD-MCI LH BG.pdf
- Supplementary Materials S1/ROC/ROC GSE63061 PINK AD-MCI LH.pdf
- Supplementary Materials S1/ROC/ROC GSE63061 PINK MCI-CTL DG BG.pdf .pdf
- Supplementary Materials S1/ROC/ROC GSE63061 PINK MCI-CTL DG.pdf
- Supplementary Materials S1/ROC/ROC GSE63061 PINK MCI-CTL LH BG.pdf
- Supplementary Materials S1/ROC/ROC GSE63061 PINK MCI-CTL LH.pdf
- Supplementary Materials S1/ROC/ROC GSE63061 RED AD-CTL DG BG.pdf
- Supplementary Materials S1/ROC/ROC GSE63061 RED AD-CTL DG.pdf
- Supplementary Materials S1/ROC/ROC GSE63061 RED AD-CTLLH BG.pdf
- Supplementary Materials S1/ROC/ROC GSE63061 RED AD-CTLLH.pdf
- Supplementary Materials S1/ROC/ROC GSE63061 RED AD-MCI DG BG.pdf
- Supplementary Materials S1/ROC/ROC GSE63061 RED AD-MCI DG.pdf
- Supplementary Materials S1/ROC/ROC GSE63061 RED AD-MCI LH BG.pdf
- Supplementary Materials S1/ROC/ROC GSE63061 RED AD-MCI LH.pdf
- Supplementary Materials S1/ROC/ROC GSE63061 RED MCI-CTL DG BG.pdf
- Supplementary Materials S1/ROC/ROC GSE63061 RED MCI-CTL DG.pdf
- Supplementary Materials S1/ROC/ROC GSE63061 RED MCI-CTL LH BG.pdf
- Supplementary Materials S1/ROC/ROC GSE63061 RED MCI-CTL LH.pdf
- Supplementary Materials S1/ROC/ROC GSE63061 TURQUIOES  AD-CTL LH BG.pdf
- Supplementary Materials S1/ROC/ROC GSE63061 TURQUIOES  AD-CTL LH.pdf
- Supplementary Materials S1/ROC/ROC GSE63061 TURQUIOES  AD-CTLDG BG.pdf
- Supplementary Materials S1/ROC/ROC GSE63061 TURQUIOES  AD-CTLDG.pdf
- Supplementary Materials S1/ROC/ROC GSE63061 TURQUIOES  AD-MCI DG BG.pdf
- Supplementary Materials S1/ROC/ROC GSE63061 TURQUIOES  AD-MCI DG.pdf
- Supplementary Materials S1/ROC/ROC GSE63061 TURQUIOES  AD-MCI LH BG.pdf
- Supplementary Materials S1/ROC/ROC GSE63061 TURQUIOES  AD-MCI LHG.pdf
- Supplementary Materials S1/ROC/ROC GSE63061 TURQUIOES  MCI-CTL DG BG.pdf
- Supplementary Materials S1/ROC/ROC GSE63061 TURQUIOES  MCI-CTL DG.pdf
- Supplementary Materials S1/ROC/ROC GSE63061 TURQUIOES  MCI-CTL LH BG.pdf
- Supplementary Materials S1/ROC/ROC GSE63061 TURQUIOES  MCI-CTL LH.pdf
- Supplementary Materials S1/ROC/ROC GSE63061 YELLOW  AD-CTL DG BG.pdf
- Supplementary Materials S1/ROC/ROC GSE63061 YELLOW  AD-CTL DG.pdf
- Supplementary Materials S1/ROC/ROC GSE63061 YELLOW  AD-CTL LH BG.pdf
- Supplementary Materials S1/ROC/ROC GSE63061 YELLOW  AD-CTL LH.pdf
- Supplementary Materials S1/ROC/ROC GSE63061 YELLOW  AD-MCI DG BG.pdf
- Supplementary Materials S1/ROC/ROC GSE63061 YELLOW  AD-MCI DG.pdf
- Supplementary Materials S1/ROC/ROC GSE63061 YELLOW  AD-MCI LH BG.pdf
- Supplementary Materials S1/ROC/ROC GSE63061 YELLOW  AD-MCI LH.pdf
- Supplementary Materials S1/ROC/ROC GSE63061 YELLOW  MCI-CTL DG BG.pdf
- Supplementary Materials S1/ROC/ROC GSE63061 YELLOW  MCI-CTL DG.pdf
- Supplementary Materials S1/ROC/ROC GSE63061 YELLOW  MCI-CTL LH BG.pdf
- Supplementary Materials S1/ROC/ROC GSE63061 YELLOW  MCI-CTL LH.pdf
- Supplementary Materials S1/┤·┬δ/05-Visualization.R
- Supplementary Materials S1/┤·┬δ/04-Interfacing.R
- Supplementary Materials S1/┤·┬δ/03-relateModsToExt.R
- Supplementary Materials S1/┤·┬δ/02-networkConstr-man.R
- Supplementary Materials S1/┤·┬δ/02-networkConstr-blo.R
- Supplementary Materials S1/┤·┬δ/02-networkConstr-aut.R
- Supplementary Materials S1/┤·┬δ/01-dataInput.R
- Supplementary Materials S1/┤·┬δ/
- Supplementary Materials S1/gse63061/yellow mci.pdf
- Supplementary Materials S1/gse63061/yellow CTL.pdf
- Supplementary Materials S1/gse63061/turquoise mci.pdf
- Supplementary Materials S1/gse63061/turquoise CTL.pdf
- Supplementary Materials S1/gse63061/turquoise AD.pdf
- Supplementary Materials S1/gse63061/blue.pdf
- Supplementary Materials S1/┤·┬δ/06-ExportNetwork.R
- Supplementary Materials S1/gse63061/blue CTL.pdf
- Supplementary Materials S1/gse63061/blue AD.pdf
- Supplementary Materials S1/gse63061/RED CTL.pdf
- Supplementary Materials S1/gse63061/RED AD.pdf
- Supplementary Materials S1/gse63061/
- Supplementary Materials S1/gse63060/yellow mci.pdf
- Supplementary Materials S1/gse63060/turquoise mci.pdf
- Supplementary Materials S1/gse63060/red ad.pdf
- Supplementary Materials S1/gse63060/purple ad.pdf
- Supplementary Materials S1/gse63060/pink ad.pdf
- Supplementary Materials S1/gse63060/brown mci.pdf
- Supplementary Materials S1/gse63060/brown ad.pdf
- Supplementary Materials S1/gse63060/blue mci.pdf
- Supplementary Materials S1/gse63060/blue ad.pdf
- Supplementary Materials S1/gse63060/black mci.pdf
- Supplementary Materials S1/gse63060/
- Supplementary Materials S1/ROC GSE63060 BLACK AD-CTL DG .pdf
- Supplementary Materials S1/ROC GSE63060 BLACK AD-CTL DG BG .pdf
- Supplementary Materials S1/ROC GSE63060 BLACK AD-CTL LH  .pdf
- Supplementary Materials S1/ROC GSE63060 BLACK AD-CTL LH BG .pdf
- Supplementary Materials S1/ROC GSE63060 BLACK AD-MCI DG .pdf
- Supplementary Materials S1/ROC GSE63060 BLACK AD-MCI DG BG.pdf
- Supplementary Materials S1/ROC GSE63060 BLACK AD-MCI LH .pdf
- Supplementary Materials S1/ROC GSE63060 BLACK AD-MCI LH BG .pdf
- Supplementary Materials S1/ROC GSE63060 BLACK MCI-CTL DG BG.pdf
- Supplementary Materials S1/ROC GSE63060 BLACK MCI-CTL DG.pdf
- Supplementary Materials S1/ROC GSE63060 BLACK MCI-CTL LH .pdf
- Supplementary Materials S1/ROC GSE63060 BLACK MCI-CTL LH BG.pdf
- Supplementary Materials S1/ROC GSE63060 BLUE AD-CTL   DG BG.pdf
- Supplementary Materials S1/ROC GSE63060 BLUE AD-CTL   DG.pdf
- Supplementary Materials S1/ROC GSE63060 BLUE AD-CTL   LH BG.pdf
- Supplementary Materials S1/ROC GSE63060 BLUE AD-CTL   LH.pdf
- Supplementary Materials S1/ROC GSE63060 BLUE AD-MCI   LH BG.pdf
- Supplementary Materials S1/ROC GSE63060 BLUE AD-MCI  DG .pdf
- Supplementary Materials S1/ROC GSE63060 BLUE AD-MCI  DG BG.pdf
- Supplementary Materials S1/ROC GSE63060 BLUE AD-MCI  LH.pdf
- Supplementary Materials S1/ROC GSE63060 BLUE MCI-CTL  DG BG.pdf
- Supplementary Materials S1/ROC GSE63060 BLUE MCI-CTL  DG.pdf
- Supplementary Materials S1/ROC GSE63060 BLUE MCI-CTL  LH .pdf
- Supplementary Materials S1/ROC GSE63060 BLUE MCI-CTL  LH BG.pdf
- Supplementary Materials S1/ROC GSE63060 BROWN AD-CTL DG BG.pdf
- Supplementary Materials S1/ROC GSE63060 BROWN AD-CTL DG.pdf
- Supplementary Materials S1/ROC GSE63060 BROWN AD-CTL LH BG.pdf
- Supplementary Materials S1/ROC GSE63060 BROWN AD-CTLLH.pdf
- Supplementary Materials S1/ROC GSE63060 BROWN AD-MCI DG BG.pdf
- Supplementary Materials S1/ROC GSE63060 BROWN AD-MCI DG.pdf
- Supplementary Materials S1/ROC GSE63060 BROWN AD-MCI LH BG.pdf
- Supplementary Materials S1/ROC GSE63060 BROWN AD-MCI LH.pdf
- Supplementary Materials S1/ROC GSE63060 BROWN MCI-CTL   LH BG.pdf
- Supplementary Materials S1/ROC GSE63060 BROWN MCI-CTL   LH.pdf
- Supplementary Materials S1/ROC GSE63060 BROWN MCI-CTL DG BG.pdf
- Supplementary Materials S1/ROC GSE63060 BROWN MCI-CTLDG.pdf
- Supplementary Materials S1/ROC GSE63060 PINK AD-CTL DG BG.pdf
- Supplementary Materials S1/ROC GSE63060 PINK AD-CTL DG.pdf
- Supplementary Materials S1/ROC GSE63060 PINK AD-CTL LH BG.pdf
- Supplementary Materials S1/ROC GSE63060 PINK AD-CTL LH.pdf
- Supplementary Materials S1/ROC GSE63060 PINK AD-MCI DG .pdf
- Supplementary Materials S1/ROC GSE63060 PINK AD-MCI DG BG.pdf
- Supplementary Materials S1/ROC GSE63060 PINK AD-MCI LH BG.pdf
- Supplementary Materials S1/ROC GSE63060 PINK AD-MCI LH.pdf
- Supplementary Materials S1/ROC GSE63060 PINK MCI-CTL DG BG.pdf
- Supplementary Materials S1/ROC GSE63060 PINK MCI-CTL DG.pdf
- Supplementary Materials S1/ROC GSE63060 PINK MCI-CTL LH .pdf
- Supplementary Materials S1/ROC GSE63060 PINK MCI-CTL LH BG .pdf
- Supplementary Materials S1/ROC GSE63060 RED AD-CTL DG BG.pdf
- Supplementary Materials S1/ROC GSE63060 RED AD-CTL DG.pdf
- Supplementary Materials S1/ROC GSE63060 RED AD-CTL LH .pdf
- Supplementary Materials S1/ROC GSE63060 RED AD-CTL LH BG.pdf
- Supplementary Materials S1/ROC GSE63060 RED AD-MCI DG BG.pdf
- Supplementary Materials S1/ROC GSE63060 RED AD-MCI DG.pdf
- Supplementary Materials S1/ROC GSE63060 RED AD-MCI LH BG.pdf
- Supplementary Materials S1/ROC GSE63060 RED AD-MCI LH.pdf
- Supplementary Materials S1/ROC GSE63060 RED MCI-CTL DDG.pdf
- Supplementary Materials S1/ROC GSE63060 RED MCI-CTL DG.pdf
- Supplementary Materials S1/ROC GSE63060 RED MCI-CTL LH BG.pdf
- Supplementary Materials S1/ROC GSE63060 RED MCI-CTL LH.pdf
- Supplementary Materials S1/ROC GSE63060 TURQUIOSE AD-CTL LH BG.pdf
- Supplementary Materials S1/ROC GSE63060 TURQUIOSE AD-CTL LH.pdf
- Supplementary Materials S1/ROC GSE63060 TURQUIOSE AD-CTLDG.pdf
- Supplementary Materials S1/ROC GSE63060 TURQUIOSE AD-MCI DG BG.pdf
- Supplementary Materials S1/ROC GSE63060 TURQUIOSE AD-MCI DG.pdf
- Supplementary Materials S1/ROC GSE63060 TURQUIOSE AD-MCI LH BG.pdf
- Supplementary Materials S1/ROC GSE63060 TURQUIOSE AD-MCI LH.pdf
- Supplementary Materials S1/ROC GSE63060 TURQUIOSE MCI-CTL DG BG.pdf
- Supplementary Materials S1/ROC GSE63060 TURQUIOSE MCI-CTL DG.pdf
- Supplementary Materials S1/ROC GSE63060 TURQUIOSE MCI-CTL LH BG.pdf
- Supplementary Materials S1/ROC GSE63060 YELLOW  AD-CTL DG BG.pdf
- Supplementary Materials S1/ROC GSE63060 YELLOW  AD-CTL DG.pdf
- Supplementary Materials S1/ROC GSE63060 YELLOW  AD-CTL LH BG.pdf
- Supplementary Materials S1/ROC GSE63060 YELLOW  AD-CTL LH.pdf
- Supplementary Materials S1/ROC GSE63060 YELLOW  AD-MCI DG BG.pdf
- Supplementary Materials S1/ROC GSE63060 YELLOW  AD-MCI DG.pdf
- Supplementary Materials S1/ROC GSE63060 YELLOW  AD-MCI LH BG.pdf
- Supplementary Materials S1/ROC GSE63060 YELLOW  AD-MCI LH.pdf
- Supplementary Materials S1/ROC GSE63060 YELLOW  MCI-CTL DG BG.pdf
- Supplementary Materials S1/ROC GSE63060 YELLOW  MCI-CTL DG.pdf
- Supplementary Materials S1/ROC GSE63060 YELLOW  MCI-CTL LH BG.pdf
- Supplementary Materials S1/ROC GSE63060 YELLOW  MCI-CTL LH.pdf
- Supplementary Materials S1/ROC GSE63060TURQUIOSE MCI-CTL LH.pdf
- Supplementary Materials S1/ROC GSE63061 BLACK AD-CTL  DG BG.pdf
- Supplementary Materials S1/ROC GSE63061 BLACK AD-CTL  DG.pdf
- Supplementary Materials S1/ROC GSE63061 BLACK AD-CTL  LH BG.pdf
- Supplementary Materials S1/ROC GSE63061 BLACK AD-CTL  LH.pdf
- Supplementary Materials S1/ROC GSE63061 BLACK AD-MCI  DG .pdf
- Supplementary Materials S1/ROC GSE63061 BLACK AD-MCI  DG BG .pdf
- Supplementary Materials S1/ROC GSE63061 BLACK AD-MCI  LH BG.pdf
- Supplementary Materials S1/ROC GSE63061 BLACK AD-MCI  LH.pdf
- Supplementary Materials S1/ROC GSE63061 BLACK MCI-CTL  DG BG.pdf
- Supplementary Materials S1/ROC GSE63061 BLACK MCI-CTL  DG pdf.pdf
- Supplementary Materials S1/ROC GSE63061 BLACK MCI-CTL  LH .pdf
- Supplementary Materials S1/ROC GSE63061 BLACK MCI-CTL  LH BGpdf.pdf
- Supplementary Materials S1/ROC GSE63061 BLUE AD-CTL   DG BG.pdf
- Supplementary Materials S1/ROC GSE63061 BLUE AD-CTL   DG.pdf
- Supplementary Materials S1/ROC GSE63061 BLUE AD-CTL   LH BG.pdf
- Supplementary Materials S1/ROC GSE63061 BLUE AD-CTL   LH.pdf
- Supplementary Materials S1/ROC GSE63061 BLUE AD-MCI   DG.pdf
[truncated: 67 more entries]
