# Supplementary material for: Identification of Temporal Characteristic Networks of Peripheral Blood Changes in Alzheimer’s Disease Based on Weighted Gene Co-expression Network Analysis
Source: Front Aging Neurosci. 2019 May 21;11:83. doi: 10.3389/fnagi.2019.00083 (PMC6537635; doi:10.3389/fnagi.2019.00083)
Supplement: Supplementary file 5 [file Data_Sheet_1.ZIP › Supplementary Materials S1/┤·┬δ/02-networkConstr-blo.R]

#=====================================================================================
#
#  Code chunk 1
#
#=====================================================================================


# Display the current working directory
getwd();
# If necessary, change the path below to the directory where the data files are stored. 
# "." means current directory. On Windows use a forward slash / instead of the usual \.
workingDir = ".";
setwd(workingDir); 
# Load the WGCNA package
library(WGCNA)
# The following setting is important, do not omit.
options(stringsAsFactors = FALSE);
# Allow multi-threading within WGCNA. This helps speed up certain calculations.
# At present this call is necessary.
# Any error here may be ignored but you may want to update WGCNA if you see one.
# Caution: skip this line if you run RStudio or other third-party R environments.
# See note above.
enableWGCNAThreads()
# Load the data saved in the first part
lnames = load(file = "FemaleLiver-01-dataInput.RData");
#The variable lnames contains the names of loaded variables.
lnames


#=====================================================================================
#
#  Code chunk 2
#
#=====================================================================================


# Choose a set of soft-thresholding powers
powers = c(c(1:10), seq(from = 12, to=20, by=2))
# Call the network topology analysis function
sft = pickSoftThreshold(datExpr, powerVector = powers, verbose = 5)
# Plot the results:
sizeGrWindow(9, 5)
par(mfrow = c(1,2));
cex1 = 0.9;
# Scale-free topology fit index as a function of the soft-thresholding power
plot(sft$fitIndices[,1], -sign(sft$fitIndices[,3])*sft$fitIndices[,2],
     xlab="Soft Threshold (power)",ylab="Scale Free Topology Model Fit,signed R^2",type="n",
     main = paste("Scale independence"));
text(sft$fitIndices[,1], -sign(sft$fitIndices[,3])*sft$fitIndices[,2],
     labels=powers,cex=cex1,col="red");
# this line corresponds to using an R^2 cut-off of h
abline(h=0.90,col="red")
# Mean connectivity as a function of the soft-thresholding power
plot(sft$fitIndices[,1], sft$fitIndices[,5],
     xlab="Soft Threshold (power)",ylab="Mean Connectivity", type="n",
     main = paste("Mean connectivity"))
text(sft$fitIndices[,1], sft$fitIndices[,5], labels=powers, cex=cex1,col="red")


#=====================================================================================
#
#  Code chunk 3
#
#=====================================================================================


bwnet = blockwiseModules(datExpr, maxBlockSize = 2000,
                       power = 6, TOMType = "unsigned", minModuleSize = 30,
                       reassignThreshold = 0, mergeCutHeight = 0.25,
                       numericLabels = TRUE,
                       saveTOMs = TRUE,
                       saveTOMFileBase = "femaleMouseTOM-blockwise",
                       verbose = 3)


#=====================================================================================
#
#  Code chunk 4
#
#=====================================================================================


# Load the results of single-block analysis
load(file = "FemaleLiver-02-networkConstruction-auto.RData");
# Relabel blockwise modules
bwLabels = matchLabels(bwnet$colors, moduleLabels);
# Convert labels to colors for plotting
bwModuleColors = labels2colors(bwLabels)


#=====================================================================================
#
#  Code chunk 5
#
#=====================================================================================


# open a graphics window
sizeGrWindow(6,6)
# Plot the dendrogram and the module colors underneath for block 1
plotDendroAndColors(bwnet$dendrograms[[1]], bwModuleColors[bwnet$blockGenes[[1]]],
                    "Module colors", main = "Gene dendrogram and module colors in block 1", 
                    dendroLabels = FALSE, hang = 0.03,
                    addGuide = TRUE, guideHang = 0.05)
# Plot the dendrogram and the module colors underneath for block 2
plotDendroAndColors(bwnet$dendrograms[[2]], bwModuleColors[bwnet$blockGenes[[2]]],
                    "Module colors", main = "Gene dendrogram and module colors in block 2", 
                    dendroLabels = FALSE, hang = 0.03,
                    addGuide = TRUE, guideHang = 0.05)


#=====================================================================================
#
#  Code chunk 6
#
#=====================================================================================


sizeGrWindow(12,9)
plotDendroAndColors(geneTree,
                    cbind(moduleColors, bwModuleColors),
                    c("Single block", "2 blocks"),
                    main = "Single block gene dendrogram and module colors",
                    dendroLabels = FALSE, hang = 0.03,
                    addGuide = TRUE, guideHang = 0.05)


#=====================================================================================
#
#  Code chunk 7
#
#=====================================================================================


singleBlockMEs = moduleEigengenes(datExpr, moduleColors)$eigengenes;
blockwiseMEs = moduleEigengenes(datExpr, bwModuleColors)$eigengenes;


#=====================================================================================
#
#  Code chunk 8
#
#=====================================================================================


single2blockwise = match(names(singleBlockMEs), names(blockwiseMEs))
signif(diag(cor(blockwiseMEs[, single2blockwise], singleBlockMEs)), 3)
