# Supplementary material for: Identification of Temporal Characteristic Networks of Peripheral Blood Changes in Alzheimer’s Disease Based on Weighted Gene Co-expression Network Analysis
Source: Front Aging Neurosci. 2019 May 21;11:83. doi: 10.3389/fnagi.2019.00083 (PMC6537635; doi:10.3389/fnagi.2019.00083)
Supplement: Supplementary file 5 [file Data_Sheet_1.ZIP › Supplementary Materials S1/┤·┬δ/04-Interfacing.R]

#=====================================================================================
#
#  Code chunk 1
#
#=====================================================================================


# Display the current working directory
getwd();
# If necessary, change the path below to the directory where the data files are stored. 
# "." means current directory. On Windows use a forward slash / instead of the usual \.
workingDir = ".";
setwd(workingDir); 
# Load the WGCNA package
library(WGCNA)
# The following setting is important, do not omit.
options(stringsAsFactors = FALSE);
# Load the expression and trait data saved in the first part
lnames = load(file = "FemaleLiver-01-dataInput.RData");
#The variable lnames contains the names of loaded variables.
lnames
# Load network data saved in the second part.
lnames = load(file = "FemaleLiver-02-networkConstruction-auto.RData");
lnames


#=====================================================================================
#
#  Code chunk 2
#
#=====================================================================================


# Read in the probe annotation
annot = read.csv(file = "GeneAnnotation.csv");
# Match probes in the data set to the probe IDs in the annotation file 
probes = names(datExpr)
probes2annot = match(probes, annot$substanceBXH)
# Get the corresponding Locuis Link IDs
allLLIDs = annot$LocusLinkID[probes2annot];
# $ Choose interesting modules
intModules = c("brown", "red", "salmon")
for (module in intModules)
{
  # Select module probes
  modGenes = (moduleColors==module)
  # Get their entrez ID codes
  modLLIDs = allLLIDs[modGenes];
  # Write them into a file
  fileName = paste("LocusLinkIDs-", module, ".txt", sep="");
  write.table(as.data.frame(modLLIDs), file = fileName,
              row.names = FALSE, col.names = FALSE)
}
# As background in the enrichment analysis, we will use all probes in the analysis.
fileName = paste("LocusLinkIDs-all.txt", sep="");
write.table(as.data.frame(allLLIDs), file = fileName,
            row.names = FALSE, col.names = FALSE)


#=====================================================================================
#
#  Code chunk 3
#
#=====================================================================================


GOenr = GOenrichmentAnalysis(moduleColors, allLLIDs, organism = "mouse", nBestP = 10);


#=====================================================================================
#
#  Code chunk 4
#
#=====================================================================================


tab = GOenr$bestPTerms[[4]]$enrichment


#=====================================================================================
#
#  Code chunk 5
#
#=====================================================================================


names(tab)


#=====================================================================================
#
#  Code chunk 6
#
#=====================================================================================


write.table(tab, file = "GOEnrichmentTable.csv", sep = ",", quote = TRUE, row.names = FALSE)


#=====================================================================================
#
#  Code chunk 7
#
#=====================================================================================


keepCols = c(1, 2, 5, 6, 7, 12, 13);
screenTab = tab[, keepCols];
# Round the numeric columns to 2 decimal places:
numCols = c(3, 4);
screenTab[, numCols] = signif(apply(screenTab[, numCols], 2, as.numeric), 2)
# Truncate the the term name to at most 40 characters
screenTab[, 7] = substring(screenTab[, 7], 1, 40)
# Shorten the column names:
colnames(screenTab) = c("module", "size", "p-val", "Bonf", "nInTerm", "ont", "term name");
rownames(screenTab) = NULL;
# Set the width of R's output. The reader should play with this number to obtain satisfactory output.
options(width=95)
# Finally, display the enrichment table:
screenTab
